# Supplementary material for: Identification and Characterization of Seminal Fluid Proteins in the Asian Tiger Mosquito, Aedes albopictus
Source: PLoS Negl Trop Dis. 2014 Jun 19;8(6):e2946. doi: 10.1371/journal.pntd.0002946 (PMC4063707; doi:10.1371/journal.pntd.0002946)
Supplement: Table S8 — Codeml analyses for Ae. albopictus putative seminal fluid proteins with putative orthologs in Ae. aegypti, Cx. quinquefasciatus and An. gambiae. (XLSX) [file pntd.0002946.s008.xlsx]

## Sheet: Sheet1
Ae. albopictus putative Sfp	M0_lnLa	M7_lnLa	M8_lnLa	M8a_lnLa	M0_dNb	M0_dSc	M0_wd	M8_prope	M8_wf	M8vM7_Pvalueg	M8vM8a_Pvalueh
Aa-11858	-3593.66	-3575.53	-3575.31	-3575.31	0.1282	2.5569	0.05015	0.00708	1	0.8039	1
Aa-13381	-4790.19	-4733.47	-4732.87	-4733.05	0.1648	5.9779	0.02757	0.00238	1.86681	0.54998	0.55002
Aa-13398	-3979.2	-3945.35	-3944.62	-3944.62	0.0521	4.144	0.01257	0.00672	1	0.48004	1
Aa-134956	-547.781	-544.505	-543.533	-543.582	0.2088	1.8869	0.11063	0.09579	1.26667	0.37839	0.7539
Aa-13680	-1524.63	-1511.5	-1511.5	-1511.5	0.0446	1.5147	0.02945	1e-05	1	1	1
Aa-14389	-1764.15	-1747.13	-1747.14	-1747.14	0.0441	5.885	0.00749	1e-05	1	1	1
Aa-14624	-4750.29	-4724.79	-4724.6	-4724.6	0.072	2.6403	0.02727	0.00714	1	0.82356	1
Aa-14663	-10321.4	-10264.1	-10264.1	-10264.1	0.1853	4.1225	0.04494	1e-05	1	1	1
Aa-15254	-2108.51	-2086.96	-2086.96	-2086.96	0.0547	1.5598	0.03509	1e-05	1	1	0.92065
Aa-154956	-2604.25	-2558.43	-2556.72	-2558.01	0.2591	3.6257	0.07145	0.01245	9.23133	0.18086	0.10763
Aa-15857	-3503.07	-3458.36	-3458.28	-3458.26	0.2501	4.4569	0.05612	0.00246	418.22	0.91949	1
Aa-16763	-3292.93	-3263.66	-3263.62	-3263.62	0.1025	2.747	0.03732	0.00129	1.36522	0.96065	0.88962
Aa-18562	-6834.5	-6756.56	-6752.38	-6753.34	0.2082	9.5901	0.02171	0.00432	7.65886	0.015328	0.16471
Aa-19306	-3284.88	-3266.11	-3262.72	-3262.73	0.0979	4.5889	0.02133	0.01201	1.20422	0.033892	0.89256
Aa-20951	-1272.86	-1264.06	-1264.02	-1264.02	0.0497	2.1352	0.02329	0.0051	1	0.96228	1
Aa-21108	-165.575	-165.451	-165.451	-165.451	0.4521	2.1361	0.21165	1e-05	1	1	1
Aa-21871	-3181.87	-3160.36	-3159.16	-3159.17	0.0463	2.3232	0.01995	0.00658	1.16079	0.30126	0.87536
Aa-22559	-4425.75	-4397.95	-4397.89	-4397.89	0.0473	3.5858	0.01319	0.00134	1	0.94705	1
Aa-24272	-16572.7	-16432.6	-16431.9	-16431.9	0.1104	3.2111	0.03438	0.00218	2.27441	0.49293	0.76052
Aa-25684	-2281.64	-2264.09	-2264.09	-2264.09	0.0441	4.5123	0.00977	1e-05	7.46576	1	1
Aa-25757	-9829.1	-9811.46	-9809.92	-9811.44	0.0192	4.5406	0.00424	0.00079	225.929	0.2143	0.080998
Aa-26716	-3926.65	-3901.65	-3901.65	-3901.65	0.1205	4.2401	0.02842	1e-05	1	1	1
Aa-26944	-2908.71	-2871.71	-2870.14	-2870.14	0.3717	9.571	0.03884	0.02284	1	0.20908	1
Aa-32547	-3155.64	-3111.04	-3111.04	-3111.04	0.1288	3.6523	0.03527	1e-05	1	1	1
Aa-33502	-2969.26	-2952.49	-2952.49	-2952.49	0.0551	2.5036	0.02202	1e-05	1	1	1
Aa-35812	-999.179	-996.066	-996.066	-996.066	0.0688	1.6305	0.04219	1e-05	1	1	1
Aa-36601	-800.852	-800.879	-800.88	-800.88	0.0152	1.477	0.0103	1e-05	1	1	1
Aa-3705	-1477.72	-1476.27	-1475.95	-1475.99	0.0166	1.6257	0.01021	0.00736	1.63535	0.72662	0.77247
Aa-39723	-1487.88	-1487.99	-1488.34	-1487.99	0.0102	3.9423	0.00258	1e-05	1	1	1
Aa-41789	-2555.8	-2542.12	-2542.12	-2542.12	0.1009	3.6374	0.02774	1e-05	1	1	1
Aa-43739	-3341.67	-3315.91	-3314.68	-3315.84	0.0385	10.7391	0.00359	0.00231	51.7346	0.29135	0.12713
Aa-45626	-2187.57	-2164.59	-2164.59	-2164.59	0.1135	2.405	0.04719	1e-05	1	1	1
Aa-45866	-5053.75	-4994.27	-4992.39	-4993.3	0.1582	6.508	0.02431	0.00515	64.4417	0.15141	0.17674
Aa-4703	-1622.8	-1599.17	-1595.41	-1595.4	0.1079	2.979	0.03621	0.0492	1.0314	0.023398	1
Aa-49591	-3121.33	-3081.26	-3081.26	-3081.26	0.1101	4.9201	0.02238	1e-05	1	1	1
Aa-51219	-2462.92	-2458.57	-2458.57	-2458.57	0.2701	17.0769	0.01582	1e-05	54.6463	1	1
Aa-52703	-3314.98	-3295.64	-3295.57	-3295.63	0.1048	3.0707	0.03413	0.00117	3.38043	0.93375	0.72648
Aa-53503	-657.148	-646.769	-645.073	-646.655	0.4324	3.1765	0.13613	0.04397	13.1887	0.18334	0.075264
Aa-5546	-1880	-1878.3	-1878.3	-1878.3	0.0088	2.0663	0.00424	1e-05	1	1	1
Aa-5809	-1597.67	-1572.73	-1571.27	-1571.27	0.2432	10.7512	0.02262	0.02847	1	0.23242	1
Aa-6300	-80.5756	-80.4887	-80.4887	-80.4887	0.6003	4.7409	0.12661	1e-05	1	1	1
Aa-71774	-430.92	-427.489	-427.489	-427.489	0.1481	2.2754	0.06511	1e-05	1	1	1
Aa-74051	-2391.16	-2363.55	-2363.37	-2363.37	0.1862	9.8275	0.01895	0.00655	1	0.83286	1
Aa-8246	-5248.91	-5202.52	-5202.15	-5202.5	0.2245	5.786	0.0388	0.00187	20.776	0.69174	0.40478
Aa-8859	-2515.13	-2477.8	-2477.8	-2477.8	0.1905	6.4191	0.02968	1e-05	1	1	1
a Log likelihood for the indicated model (M0, M7, M8, M8a).
b Gene-averaged dN estimated under M0.
c Gene-averaged dS estimated under M0.
d Gene-averaged w (dN/dS) estimated under M0.
e Proportion of sites with w > 1 under M8.
f Value of w for sites with w > 1 under M8.
g P-value for the M8 vs. M7 comparison, from a chi-square distribution with two degrees of freedom.
h P-value for the M8 vs. M8a comparison, from a chi-square distribution with one degree of freedom.
